# Supplementary material for: Using large administrative data for mining patients’ trajectories for risk stratification: An example from urological diseases
Source: PubMed Central journal article supplement (PMC11559980; doi:10.1371/journal.pone.0310981), 2024-11-13
Supplement: pone.0310981.s001.pdf [file pone.0310981.s001.pdf]

## **S1 File. ICD Codes Included as Urological Diseases**

N20 - N23 - Stones

N30 - N39 Diseases of the Urinary System

N40 - N53 Diseases of Male Genital Organs

C60 - C69 - Cancers of Urological Diseases

\* N390 Urinary tract infection, N393 Urinary Incontinence Female, Male was excluded from analysis.
