# Supplementary material for: Using large administrative data for mining patients’ trajectories for risk stratification: An example from urological diseases
Source: PubMed Central journal article supplement (PMC11559980; doi:10.1371/journal.pone.0310981), 2024-11-13
Supplement: pone.0310981.s003.pdf [file pone.0310981.s003.pdf]

**S3 File. Diagnostic of latent class trajectory model and model selection process for patients with two or more admissions. (Sub-analysis)**

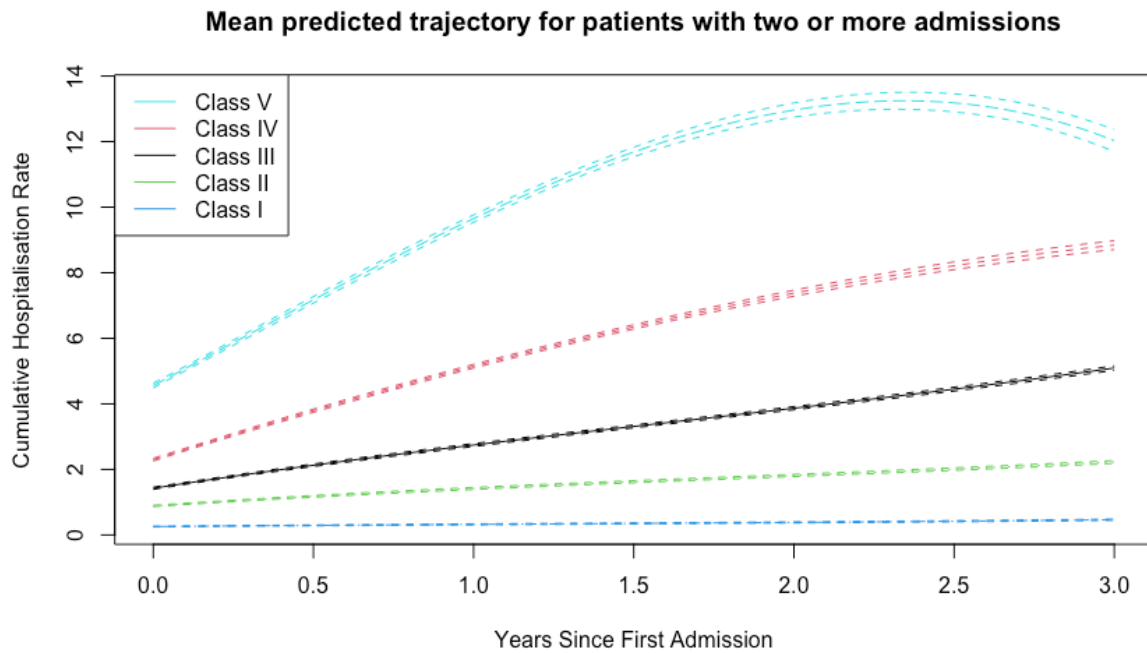

Figure 1 Fitted trajectories for each class for patients with two or more admissions, indicating the trajectory of total hospitalisations that a urology patient may exhibit within 3 years of first hospitalisation, clustered into 5 groups of no (class I), low (class II), medium (class III), medium-high (class IV) and high hospitalisations (class V).

Table 1: Polynomial Degrees with BIC and Residual Standard Error

| Model Degree | BIC             | Residual Standard Error |
|--------------|-----------------|-------------------------|
| 1            | 202253.6        | 0.00281                 |
| 2            | 199343.0        | 0.00342                 |
| 3            | <b>197896.4</b> | <b>0.00321</b>          |
| 4            | 197296.3        | 0.00336                 |

\* Selected Candidate Model in Bold.

Table 2: Model Diagnostics including entropy, relative entropy and BIC

| Number of Classes | 2         | 3         | 4              | 5*        | 6         | 7         |
|-------------------|-----------|-----------|----------------|-----------|-----------|-----------|
| Entropy           | 5046.73   | 12024.79  | 17638.45       | 23061.66  | 27059.15  | 29000.66  |
| Relative Entropy  | 0.82      | 0.72      | 0.68           | 0.64      | 0.62      | 0.62      |
| BIC               | 217071.09 | 203738.10 | 195973.67<br>7 | 190299.40 | 187587.45 | 185502.60 |

\* Indicates best model selected.

Table 3: Average posterior probability

| Number of Classes | APPA  |       |       |       |       |       |       |
|-------------------|-------|-------|-------|-------|-------|-------|-------|
| 2                 | 0.96  | 0.881 | NA    | NA    | NA    | NA    | NA    |
| 3                 | 0.807 | 0.911 | 0.688 | NA    | NA    | NA    | NA    |
| 4                 | 0.836 | 0.963 | 0.824 | 0.688 | NA    | NA    | NA    |
| 5*                | 0.534 | 0.888 | 0.754 | 0.747 | 0.91  | NA    | NA    |
| 6                 | 0.852 | 0.874 | 0.801 | 0.845 | 0.558 | 0.479 | NA    |
| 7                 | 0.564 | 0.984 | 0.827 | 0.729 | 0.388 | 0.696 | 0.751 |

\* Indicates best model selected.

Table 4: Odds of Correct Classification

| Number of Classes | OCC     |           |        |        |         |        |        |
|-------------------|---------|-----------|--------|--------|---------|--------|--------|
| 2                 | 2.729   | 64.662    | NA     | NA     | NA      | NA     | NA     |
| 3                 | 101.586 | 3.173     | 9.002  | NA     | NA      | NA     | NA     |
| 4                 | 51.985  | 1467.681  | 2.675  | 6.416  | NA      | NA     | NA     |
| 5*                | 8.939   | 121.369   | 8.106  | 2.527  | 840.656 | NA     | NA     |
| 6                 | 128.668 | 640.002   | 58.886 | 5.783  | 3.276   | 6.757  | NA     |
| 7                 | 3.321   | 10918.393 | 5.729  | 39.729 | 11.903  | 16.865 | 114.06 |

\* Indicates best model selected.

Table 5: Mismatch

| Number of Classes | Mismatch |        |        |        |       |        |       |
|-------------------|----------|--------|--------|--------|-------|--------|-------|
| 2                 | 0.028    | -0.028 | NA     | NA     | NA    | NA     | NA    |
| 3                 | 0.003    | 0.018  | -0.021 | NA     | NA    | NA     | NA    |
| 4                 | -0.035   | -0.002 | 0.104  | -0.066 | NA    | NA     | NA    |
| 5*                | 0.012    | -0.024 | -0.134 | 0.145  | 0.001 | NA     | NA    |
| 6                 | -0.012   | 0.001  | -0.038 | -0.02  | 0.052 | 0.015  | NA    |
| 7                 | 0.047    | 0      | 0.002  | -0.038 | 0.051 | -0.065 | 0.004 |

\* Indicates best model selected
