# Supplementary material for: Using large administrative data for mining patients’ trajectories for risk stratification: An example from urological diseases
Source: PubMed Central journal article supplement (PMC11559980; doi:10.1371/journal.pone.0310981), 2024-11-13
Supplement: pone.0310981.s004.pdf [file pone.0310981.s004.pdf]

**S4 File. Full results of baseline, comorbidity and diagnosis model**

Table 1: Baseline and comorbidity multinomial logistic regression model for predicting group membership

| Variables                     | Odds Ratio                |                   |                    |                   |                   |
|-------------------------------|---------------------------|-------------------|--------------------|-------------------|-------------------|
|                               | Class I                   | Class II (95% CI) | Class III (95% CI) | Class IV (95% CI) | Class V (95% CI)  |
|                               | <b>Baseline Model</b>     |                   |                    |                   |                   |
| <b>Intercept</b>              | 1                         | 0.01 (0.0-0.01)*  | 0.0 (0.0-0.0)*     | 0.0 (0.0-0.0)*    | 0.0 (0.0-0.0)*    |
| <b>Age</b>                    | 1                         | 1.02 (1.02-1.02)* | 1.03 (1.03-1.03)*  | 1.02 (1.02-1.02)* | 1.0 (1.0-1.0)     |
| <b>CALD</b>                   | 1                         | 1.0 (0.73-1.37)   | 0.96 (0.7-1.31)    | 0.94 (0.54-1.63)  | 0.73 (0.27-1.97)  |
| <b>Charlson score</b>         | 1                         | 1.05 (1.05-1.05)* | 1.07 (1.07-1.07)*  | 1.12 (1.12-1.12)* | 1.14 (1.14-1.14)* |
| <b>Emergency</b>              | 1                         | 1.19 (1.1-1.28)*  | 3.16 (2.98-3.35)*  | 2.66 (2.42-2.94)* | 3.39 (2.78-4.12)* |
| <b>HACs</b>                   | 1                         | 1.31 (1.19-1.44)* | 1.52 (1.41-1.65)*  | 1.46 (1.27-1.68)* | 1.15 (0.89-1.48)  |
| <b>Insurance</b>              | 1                         | 1.25 (1.17-1.32)* | 1.15 (1.08-1.22)*  | 1.05 (0.95-1.16)  | 1.15 (0.96-1.37)  |
| <b>Male</b>                   | 1                         | 1.9 (1.75-2.05)*  | 1.48 (1.37-1.6)*   | 1.28 (1.12-1.47)* | 1.16 (0.92-1.47)  |
| <b>Non-English Pref</b>       | 1                         | 0.93 (0.68-1.28)  | 1.17 (0.86-1.61)   | 1.11 (0.64-1.91)  | 0.95 (0.34-2.69)  |
| <b>Regional</b>               | 1                         | 1.04 (0.94-1.15)  | 0.92 (0.84-1.02)   | 0.79 (0.66-0.94)* | 0.7 (0.5-0.98)*   |
| <b>Rural</b>                  | 1                         | 1.08 (1.02-1.15)* | 1.0 (0.94-1.06)    | 0.94 (0.84-1.06)  | 1.13 (0.93-1.37)  |
|                               | <b>Comorbidity Models</b> |                   |                    |                   |                   |
| <b>Age</b>                    | 1                         | 1.02 (1.02-1.02)* | 1.04 (1.04-1.04)*  | 1.03 (1.03-1.03)* | 1.02 (1.02-1.02)* |
| <b>CALD</b>                   | 1                         | 1.01 (0.74-1.38)  | 1.01 (0.75-1.36)   | 1.02 (0.6-1.73)   | 0.82 (0.3-2.22)   |
| <b>Cardiovascular disease</b> | 1                         | 0.76 (0.6-0.97)*  | 0.98 (0.84-1.15)   | 0.73 (0.55-0.98)* | 0.87 (0.53-1.42)  |
| <b>Diabetes</b>               | 1                         | 1.14 (1.05-1.23)* | 1.23 (1.16-1.31)*  | 1.05 (0.93-1.18)  | 0.95 (0.75-1.2)   |
| <b>Emergency</b>              | 1                         | 1.35 (1.25-1.46)* | 3.63 (3.43-3.85)*  | 3.82 (3.46-4.21)* | 5.47 (4.59-6.53)* |
| <b>HACs</b>                   | 1                         | 1.58 (1.44-1.75)* | 1.9 (1.75-2.05)*   | 2.32 (2.02-2.66)* | 2.05 (1.59-2.65)* |
| <b>Insurance</b>              | 1                         | 1.23 (1.16-1.31)* | 1.13 (1.06-1.2)*   | 0.99 (0.9-1.09)   | 1.03 (0.86-1.23)  |
| <b>Liver disease</b>          | 1                         | 0.76 (0.31-1.88)  | 1.09 (0.6-2.01)    | 1.48 (0.62-3.5)   | 0.65 (0.09-4.9)   |
| <b>Male</b>                   | 1                         | 1.99 (1.84-2.16)* | 1.58 (1.46-1.71)*  | 1.48 (1.29-1.69)* | 1.39 (1.1-1.76)*  |

|                                  |   |                   |                   |                   |                   |
|----------------------------------|---|-------------------|-------------------|-------------------|-------------------|
| <b>Non-English Preferred</b>     | 1 | 0.96 (0.7-1.31)   | 1.25 (0.91-1.71)  | 1.19 (0.68-2.05)  | 1.04 (0.37-2.94)  |
| <b>Regional</b>                  | 1 | 1.05 (0.95-1.16)  | 0.93 (0.85-1.03)  | 0.8 (0.67-0.96)*  | 0.73 (0.53-1.02)  |
| <b>Renal disease</b>             | 1 | 1.43 (1.16-1.78)* | 1.84 (1.57-2.15)* | 2.25 (1.78-2.84)* | 2.39 (1.61-3.53)* |
| <b>Rural</b>                     | 1 | 1.09 (1.03-1.16)* | 1.01 (0.95-1.07)  | 0.96 (0.85-1.08)  | 1.14 (0.94-1.39)  |
| <b>Two or more comorbidities</b> | 1 | 1.02 (0.87-1.19)  | 1.2 (1.06-1.35)*  | 0.96 (0.77-1.19)  | 0.94 (0.65-1.37)  |

\*indicates significant associations (p <0.05)

Table 2 Multiple multinomial logistic regression results and odds ratio for baseline urological diseases without surgical interventions

| Disease w/ no surgical interventions              | Class I | Class II          | Class III         | Class IV           | Class V             |
|---------------------------------------------------|---------|-------------------|-------------------|--------------------|---------------------|
| <b>Benign prostatic hyperplasia</b>               | 1       | 0.84 (0.79-0.89)* | 0.87 (0.82-0.92)* | 0.39 (0.34-0.45)*  | 0.24 (0.17-0.33)*   |
| <b>Bladder cancer</b>                             | 1       | 2.69 (2.44-2.97)* | 3.0 (2.72-3.31)*  | 4.57 (3.99-5.24)*  | 6.17 (4.78-7.96)*   |
| <b>Bladder-neck obstruction</b>                   | 1       | 1.22 (1.04-1.43)* | 0.92 (0.77-1.1)   | 0.45 (0.29-0.7)*   | 0.17 (0.04-0.67)*   |
| <b>Calculus of bladder</b>                        | 1       | 1.16 (0.99-1.36)  | 1.38 (1.18-1.61)* | 0.9 (0.64-1.25)    | 0.33 (0.12-0.91)*   |
| <b>Calculus of kidney</b>                         | 1       | 0.93 (0.83-1.05)  | 0.88 (0.78-0.99)* | 0.88 (0.72-1.07)   | 0.33 (0.19-0.55)*   |
| <b>Calculus of kidney with calculus of ureter</b> | 1       | 1.07 (0.86-1.33)  | 1.02 (0.82-1.27)  | 0.4 (0.22-0.72)*   | 0.63 (0.29-1.38)    |
| <b>Calculus of ureter</b>                         | 1       | 0.51 (0.45-0.59)* | 0.49 (0.42-0.56)* | 0.26 (0.19-0.35)*  | 0.1 (0.04-0.21)*    |
| <b>Cystitis</b>                                   | 1       | 0.58 (0.46-0.74)* | 0.53 (0.44-0.65)* | 0.34 (0.22-0.52)*  | 0.21 (0.08-0.54)*   |
| <b>Disorders of prepuce</b>                       | 1       | 0.32 (0.25-0.42)* | 0.36 (0.29-0.46)* | 0.18 (0.1-0.32)*   | 0.27 (0.11-0.65)*   |
| <b>Hydrocele</b>                                  | 1       | 0.31 (0.22-0.42)* | 0.38 (0.29-0.5)*  | 0.22 (0.12-0.43)*  | 0.16 (0.04-0.63)*   |
| <b>Irradiation cystitis</b>                       | 1       | 1.4 (1.03-1.92)*  | 1.36 (1.02-1.83)* | 1.95 (1.27-3.01)*  | 3.16 (1.69-5.91)*   |
| <b>Kidney cancer</b>                              | 1       | 2.1 (1.83-2.4)*   | 3.82 (3.46-4.21)* | 6.3 (5.49-7.22)*   | 10.38 (8.37-12.88)* |
| <b>Other bladder disorders</b>                    | 1       | 0.68 (0.61-0.75)* | 0.63 (0.57-0.69)* | 0.51 (0.41-0.63)*  | 0.48 (0.32-0.71)*   |
| <b>Other male genital organ disorders</b>         | 1       | 0.37 (0.28-0.49)* | 0.36 (0.28-0.47)* | 0.15 (0.07-0.29)*  | 0.04 (0.0-0.36)*    |
| <b>Other penis disorders</b>                      | 1       | 0.66 (0.44-0.97)* | 0.66 (0.46-0.94)* | 0.27 (0.1-0.73)*   | 0.04 (0.0-3.42)     |
| <b>Other urinary incontinence</b>                 | 1       | 0.59 (0.49-0.72)* | 0.48 (0.4-0.57)*  | 0.16 (0.1-0.26)*   | 0.14 (0.05-0.36)*   |
| <b>Prostate cancer</b>                            | 1       | 1.72 (1.62-1.82)* | 1.67 (1.57-1.77)* | 3.49 (3.16-3.85)*  | 3.94 (3.23-4.79)*   |
| <b>Testicular cancer</b>                          | 1       | 0.78 (0.45-1.35)  | 3.39 (2.38-4.82)* | 9.68 (6.41-14.61)* | 32.79 (21.3-50.46)* |
| <b>Urethral stricture</b>                         | 1       | 1.19 (1.07-1.31)* | 0.77 (0.67-0.88)* | 0.48 (0.36-0.64)*  | 0.18 (0.07-0.42)*   |

\*indicates significant associations (p <0.05)

Table 3 Multiple multinomial logistic regression results and odds ratio for baseline urological diseases with surgical interventions

| Disease w/ surgical interventions                 | Class I | Class II          | Class III         | Class IV          | Class V            |
|---------------------------------------------------|---------|-------------------|-------------------|-------------------|--------------------|
| <b>Benign prostatic hyperplasia</b>               | 1       | 0.48 (0.43-0.54)* | 0.32 (0.28-0.37)* | 0.15 (0.11-0.19)* | 0.12 (0.07-0.19)*  |
| <b>Bladder cancer</b>                             | 1       | 1.52 (1.33-1.75)* | 1.11 (0.94-1.29)* | 1.65 (1.28-2.13)* | 2.77 (1.73-4.44)*  |
| <b>Bladder-neck obstruction</b>                   | 1       | 0.7 (0.58-0.83)*  | 0.34 (0.27-0.42)* | 0.17 (0.1-0.27)*  | 0.08 (0.02-0.33)*  |
| <b>Calculus of bladder</b>                        | 1       | 0.66 (0.56-0.79)* | 0.51 (0.42-0.62)* | 0.33 (0.22-0.48)* | 0.15 (0.05-0.45)*  |
| <b>Calculus of kidney</b>                         | 1       | 0.53 (0.45-0.62)* | 0.32 (0.28-0.38)* | 0.32 (0.24-0.42)* | 0.15 (0.08-0.29)*  |
| <b>Calculus of kidney with calculus of ureter</b> | 1       | 0.61 (0.48-0.78)* | 0.38 (0.29-0.48)* | 0.15 (0.08-0.27)* | 0.29 (0.12-0.7)*   |
| <b>Calculus of ureter</b>                         | 1       | 0.29 (0.24-0.34)* | 0.18 (0.15-0.21)* | 0.09 (0.06-0.13)* | 0.04 (0.02-0.1)*   |
| <b>Cystitis</b>                                   | 1       | 0.34 (0.26-0.43)* | 0.2 (0.16-0.25)*  | 0.13 (0.08-0.21)* | 0.09 (0.03-0.27)*  |
| <b>Disorders of prepuce</b>                       | 1       | 0.18 (0.14-0.24)* | 0.13 (0.1-0.17)*  | 0.06 (0.03-0.12)* | 0.12 (0.05-0.32)*  |
| <b>Hydrocele</b>                                  | 1       | 0.17 (0.12-0.24)* | 0.14 (0.1-0.19)*  | 0.08 (0.04-0.16)* | 0.07 (0.02-0.31)*  |
| <b>Irradiation cystitis</b>                       | 1       | 0.8 (0.58-1.12)*  | 0.5 (0.37-0.69)*  | 0.71 (0.44-1.16)* | 1.46 (0.71-3.02)*  |
| <b>Kidney cancer</b>                              | 1       | 1.2 (1.0-1.43)*   | 1.42 (1.21-1.66)* | 2.34 (1.81-3.02)* | 4.9 (3.12-7.7)*    |
| <b>Other bladder disorders</b>                    | 1       | 0.41 (0.36-0.47)* | 0.25 (0.21-0.29)* | 0.2 (0.15-0.28)*  | 0.24 (0.14-0.42)*  |
| <b>Other male genital organ disorders</b>         | 1       | 0.21 (0.16-0.28)* | 0.13 (0.1-0.17)*  | 0.05 (0.03-0.11)* | 0.02 (0.0-0.17)*   |
| <b>Other penis disorders</b>                      | 1       | 0.38 (0.25-0.57)* | 0.24 (0.17-0.35)* | 0.1 (0.04-0.27)*  | 0.02 (0.0-1.58)*   |
| <b>Other urinary incontinence</b>                 | 1       | 0.34 (0.27-0.42)* | 0.18 (0.14-0.22)* | 0.06 (0.03-0.1)*  | 0.06 (0.02-0.17)*  |
| <b>Prostate cancer</b>                            | 1       | 1.09 (0.97-1.23)* | 0.68 (0.59-0.78)* | 1.75 (1.38-2.21)* | 2.51 (1.63-3.86)*  |
| <b>Testicular cancer</b>                          | 1       | 0.44 (0.26-0.77)* | 1.26 (0.87-1.83)* | 3.6 (2.25-5.76)*  | 15.8 (8.78-28.45)* |
| <b>Urethral stricture</b>                         | 1       | 0.67 (0.58-0.77)* | 0.29 (0.24-0.35)* | 0.18 (0.13-0.27)* | 0.09 (0.03-0.22)*  |

\*indicates significant associations (p <0.05)
