# Supplementary material for: Using large administrative data for mining patients’ trajectories for risk stratification: An example from urological diseases
Source: PubMed Central journal article supplement (PMC11559980; doi:10.1371/journal.pone.0310981), 2024-11-13
Supplement: pone.0310981.s005.pdf [file pone.0310981.s005.pdf]

## S5 File. Full results of sub-analysis of baseline, comorbidity, and diagnosis model

### Sub-analysis of patients with two or more admissions

Similar trajectories were shown for patients with two or more admissions when compared to the trajectories for all patients (Figure 1).

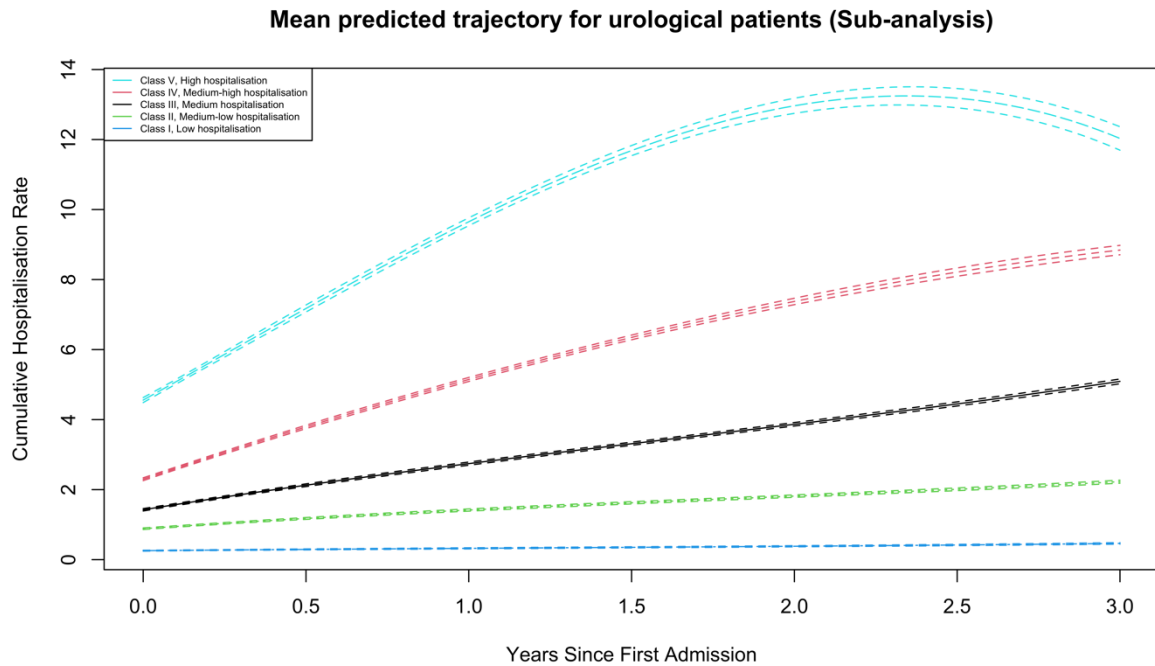

Figure 1: Sub-analysis trajectories of patients diagnosed with urological diseases

Table 1: Baseline and comorbidity multinomial logistic regression model for predicting group membership (sub-analysis).

| Variables                     | Odds Ratio                |                    |                    |                      |                     |
|-------------------------------|---------------------------|--------------------|--------------------|----------------------|---------------------|
|                               | Class I                   | Class II (95% CI)  | Class III (95% CI) | Class IV (95% CI)    | Class V (95% CI)    |
|                               | <b>Baseline Model</b>     |                    |                    |                      |                     |
| <b>Intercept</b>              | 1                         | 0.0 (0.0-0.0)*     | 0.01 (0.01-0.01)*  | 0.0 (0.0-0.0)*       | 0.0 (0.0-0.0)*      |
| <b>Age</b>                    | 1                         | 1.05 (1.05-1.05)*  | 1.03 (1.03-1.03)*  | 1.04 (1.04-1.04)*    | 1.02 (1.02-1.02)*   |
| <b>CALD</b>                   | 1                         | 1.07 (0.75-1.53)   | 1.02 (0.73-1.42)   | 0.99 (0.54-1.82)     | 0.78 (0.28-2.16)    |
| <b>Charlson score</b>         | 1                         | 1.12 (1.12-1.12)*  | 1.06 (1.06-1.06)*  | 1.17 (1.17-1.17)*    | 1.21 (1.19-1.23)*   |
| <b>Emergency</b>              | 1                         | 6.23 (5.76-6.74)*  | 2.25 (2.08-2.43)*  | 5.47 (4.87-6.16)*    | 6.96 (5.83-8.3)*    |
| <b>HACs</b>                   | 1                         | 4.76 (4.23-5.35)*  | 3.74 (3.33-4.21)*  | 4.44 (3.72-5.29)*    | 3.74 (2.85-4.93)*   |
| <b>Insurance</b>              | 1                         | 1.05 (0.99-1.11)   | 1.12 (1.05-1.18)*  | 0.99 (0.88-1.11)     | 1.08 (0.91-1.29)    |
| <b>Male</b>                   | 1                         | 0.98 (0.89-1.08)   | 1.32 (1.2-1.46)*   | 0.79 (0.68-0.93)*    | 0.76 (0.59-0.98)*   |
| <b>Non-English Pref</b>       | 1                         | 1.34 (0.92-1.94)   | 1.08 (0.78-1.51)   | 1.23 (0.66-2.31)     | 1.08 (0.38-3.12)    |
| <b>Regional</b>               | 1                         | 0.91 (0.81-1.03)   | 1.03 (0.93-1.14)   | 0.8 (0.66-0.98)*     | 0.71 (0.51-0.99)*   |
| <b>Rural</b>                  | 1                         | 1.03 (0.95-1.11)   | 1.04 (0.96-1.13)   | 0.96 (0.84-1.1)      | 1.11 (0.89-1.37)    |
|                               | <b>Comorbidity Models</b> |                    |                    |                      |                     |
| <b>Age</b>                    | 1                         | 1.05 (1.05-1.05)*  | 1.04 (1.04-1.04)*  | 1.05 (1.05-1.05)*    | 1.04 (1.04-1.04)*   |
| <b>CALD</b>                   | 1                         | 1.09 (0.77-1.56)   | 1.0 (0.72-1.4)     | 1.08 (0.6-1.95)      | 0.96 (0.36-2.56)    |
| <b>Cardiovascular disease</b> | 1                         | 3.25 (2.47-4.28)*  | 2.72 (2.03-3.65)*  | 2.36 (1.63-3.43)*    | 3.03 (1.79-5.15)*   |
| <b>Diabetes</b>               | 1                         | 1.26 (1.16-1.36)*  | 1.21 (1.12-1.31)*  | 1.09 (0.95-1.26)     | 0.98 (0.77-1.24)    |
| <b>Emergency</b>              | 1                         | 5.21 (4.81-5.63)*  | 1.92 (1.77-2.07)*  | 5.16 (4.58-5.8)*     | 6.89 (5.78-8.22)*   |
| <b>HACs</b>                   | 1                         | 4.9 (4.36-5.52)*   | 3.63 (3.23-4.09)*  | 5.47 (4.59-6.53)*    | 5.1 (3.96-6.59)*    |
| <b>Insurance</b>              | 1                         | 1.03 (0.97-1.09)   | 1.12 (1.05-1.18)*  | 0.91 (0.81-1.03)     | 0.96 (0.81-1.15)    |
| <b>Liver disease</b>          | 1                         | 19.11 (4.39-83.1)* | 13.07 (2.89-59.1)* | 34.12 (7.11-163.69)* | 11.36 (0.94-136.89) |
| <b>Male</b>                   | 1                         | 1.15 (1.04-1.27)*  | 1.45 (1.31-1.6)*   | 1.02 (0.87-1.19)     | 1.04 (0.82-1.32)    |
| <b>Non-English Pref</b>       | 1                         | 1.43 (0.99-2.08)   | 1.11 (0.79-1.54)   | 1.39 (0.76-2.55)     | 1.34 (0.48-3.7)     |

|                                  |   |                   |                   |                   |                    |
|----------------------------------|---|-------------------|-------------------|-------------------|--------------------|
| <b>Regional</b>                  | 1 | 0.95 (0.85-1.07)  | 1.05 (0.95-1.16)  | 0.84 (0.69-1.03)  | 0.76 (0.54-1.05)   |
| <b>Renal disease</b>             | 1 | 5.42 (4.2-6.99)*  | 3.9 (2.96-5.13)*  | 6.11 (4.47-8.36)* | 6.96 (4.52-10.71)* |
| <b>Rural</b>                     | 1 | 1.08 (1.0-1.17)   | 1.07 (0.99-1.16)  | 1.03 (0.9-1.18)   | 1.2 (0.97-1.49)    |
| <b>Two or more comorbidities</b> | 1 | 3.29 (2.76-3.92)* | 2.61 (2.19-3.12)* | 2.41 (1.87-3.11)* | 2.53 (1.71-3.75)*  |

\* indicates significant associations (p <0.05)

Table 2 Sub-analysis multiple multinomial logistic regression results and odds ratio for baseline urological diseases with non surgical interventions

| <b>Disease w/ no surgical interventions</b>       | <b>Class I</b> | <b>Class II</b>   | <b>Class III</b>  | <b>Class IV</b>      |
|---------------------------------------------------|----------------|-------------------|-------------------|----------------------|
| <b>Benign prostatic hyperplasia</b>               | 1              | 1.55 (1.44-1.68)* | 1.72 (1.59-1.86)* | 0.73 (0.62-0.85)*    |
| <b>Bladder cancer</b>                             | 1              | 1.6 (1.42-1.8)*   | 1.35 (1.22-1.49)* | 2.39 (2.04-2.79)*    |
| <b>Bladder-neck obstruction</b>                   | 1              | 1.13 (0.91-1.4)   | 1.42 (1.21-1.66)* | 0.51 (0.31-0.84)*    |
| <b>Calculus of bladder</b>                        | 1              | 1.36 (1.12-1.66)* | 1.28 (1.1-1.5)*   | 0.9 (0.62-1.31)      |
| <b>Calculus of kidney</b>                         | 1              | 0.59 (0.52-0.68)* | 0.6 (0.53-0.68)*  | 0.51 (0.4-0.64)*     |
| <b>Calculus of kidney with calculus of ureter</b> | 1              | 0.52 (0.41-0.65)* | 0.53 (0.42-0.67)* | 0.2 (0.11-0.37)*     |
| <b>Calculus of ureter</b>                         | 1              | 0.23 (0.2-0.27)*  | 0.28 (0.24-0.32)* | 0.1 (0.07-0.15)*     |
| <b>Cystitis</b>                                   | 1              | 0.93 (0.72-1.2)   | 0.96 (0.76-1.22)  | 0.51 (0.31-0.85)*    |
| <b>Disorders of prepuce</b>                       | 1              | 0.64 (0.48-0.86)* | 0.73 (0.55-0.96)* | 0.35 (0.19-0.65)*    |
| <b>Hydrocele</b>                                  | 1              | 0.65 (0.45-0.94)* | 0.86 (0.63-1.18)  | 0.55 (0.28-1.07)     |
| <b>Irradiation cystitis</b>                       | 1              | 1.14 (0.8-1.62)   | 1.12 (0.8-1.56)   | 1.65 (1.03-2.64)*    |
| <b>Kidney cancer</b>                              | 1              | 7.69 (6.7-8.82)*  | 3.97 (3.4-4.65)*  | 12.68 (10.63-15.13)* |
| <b>Other bladder disorders</b>                    | 1              | 0.68 (0.61-0.77)* | 0.84 (0.76-0.93)* | 0.58 (0.46-0.74)*    |
| <b>Other male genital organ disorders</b>         | 1              | 1.55 (1.11-2.17)* | 1.63 (1.19-2.23)* | 0.5 (0.21-1.18)      |
| <b>Other penis disorders</b>                      | 1              | 1.6 (0.98-2.61)   | 1.46 (0.91-2.34)  | 0.54 (0.17-1.76)     |
| <b>Other urinary incontinence</b>                 | 1              | 1.49 (1.18-1.89)* | 1.7 (1.37-2.11)*  | 0.52 (0.3-0.88)*     |
| <b>Prostate cancer</b>                            | 1              | 0.95 (0.88-1.03)  | 0.84 (0.78-0.91)* | 2.01 (1.79-2.27)*    |
| <b>Testicular cancer</b>                          | 1              | 4.85 (3.28-7.19)* | 0.93 (0.56-1.55)  | 13.33 (8.49-20.92)*  |
| <b>Urethral stricture</b>                         | 1              | 0.61 (0.52-0.72)* | 0.95 (0.85-1.07)  | 0.33 (0.23-0.46)*    |

\*indicates significant associations (p <0.05)

Table 3 Sub-analysis multiple multinomial logistic regression results and odds ratio for baseline urological diseases with surgical interventions

| <b>Disease w/ surgical interventions</b>          | <b>Class I</b> | <b>Class II</b>   | <b>Class III</b>  | <b>Class IV</b>   |
|---------------------------------------------------|----------------|-------------------|-------------------|-------------------|
| <b>Benign prostatic hyperplasia</b>               | 1              | 0.43 (0.37-0.5)*  | 0.7 (0.62-0.78)*  | 0.23 (0.17-0.3)*  |
| <b>Bladder cancer</b>                             | 1              | 0.47 (0.39-0.56)* | 0.58 (0.51-0.67)* | 0.74 (0.56-0.97)* |
| <b>Bladder-neck obstruction</b>                   | 1              | 0.33 (0.25-0.42)* | 0.61 (0.51-0.72)* | 0.16 (0.09-0.27)* |
| <b>Calculus of bladder</b>                        | 1              | 0.4 (0.31-0.5)*   | 0.55 (0.46-0.66)* | 0.28 (0.18-0.43)* |
| <b>Calculus of kidney</b>                         | 1              | 0.17 (0.14-0.21)* | 0.25 (0.22-0.3)*  | 0.15 (0.11-0.21)* |
| <b>Calculus of kidney with calculus of ureter</b> | 1              | 0.15 (0.11-0.2)*  | 0.23 (0.18-0.3)*  | 0.06 (0.03-0.12)* |
| <b>Calculus of ureter</b>                         | 1              | 0.07 (0.05-0.08)* | 0.12 (0.1-0.14)*  | 0.03 (0.02-0.05)* |
| <b>Cystitis</b>                                   | 1              | 0.27 (0.2-0.37)*  | 0.41 (0.32-0.54)* | 0.16 (0.09-0.27)* |
| <b>Disorders of prepuce</b>                       | 1              | 0.19 (0.13-0.26)* | 0.31 (0.23-0.42)* | 0.11 (0.05-0.21)* |
| <b>Hydrocele</b>                                  | 1              | 0.19 (0.13-0.28)* | 0.37 (0.27-0.52)* | 0.17 (0.08-0.34)* |
| <b>Irradiation cystitis</b>                       | 1              | 0.33 (0.23-0.48)* | 0.48 (0.34-0.69)* | 0.51 (0.3-0.84)*  |
| <b>Kidney cancer</b>                              | 1              | 2.1 (1.72-2.55)*  | 1.67 (1.4-1.99)*  | 3.53 (2.63-4.73)* |
| <b>Other bladder disorders</b>                    | 1              | 0.21 (0.17-0.25)* | 0.37 (0.32-0.43)* | 0.19 (0.14-0.26)* |
| <b>Other male genital organ disorders</b>         | 1              | 0.45 (0.32-0.65)* | 0.71 (0.51-0.99)* | 0.15 (0.06-0.37)* |
| <b>Other penis disorders</b>                      | 1              | 0.47 (0.28-0.78)* | 0.63 (0.39-1.03)* | 0.17 (0.05-0.55)* |
| <b>Other urinary incontinence</b>                 | 1              | 0.43 (0.33-0.57)* | 0.73 (0.58-0.93)* | 0.16 (0.09-0.28)* |
| <b>Prostate cancer</b>                            | 1              | 0.27 (0.23-0.32)* | 0.35 (0.31-0.39)* | 0.76 (0.59-0.98)* |
| <b>Testicular cancer</b>                          | 1              | 1.42 (0.94-2.14)* | 0.4 (0.24-0.67)*  | 4.14 (2.53-6.75)* |
| <b>Urethral stricture</b>                         | 1              | 0.18 (0.15-0.23)* | 0.41 (0.35-0.49)* | 0.11 (0.07-0.16)* |

\*indicates significant associations (p <0.05)
